# Supplementary material
Source: PubMed Central journal article supplement (PMC8061684)
Supplement: NIHMS1635724-supplement-Supplemental_Tables.pdf [file NIHMS1635724-supplement-Supplemental_Tables.pdf]

## Supplemental Tables

**Supplemental Table 1: Cholesterol Levels by Statin Use**

|                                          | <b>Statin Use<br/>(N=67)</b> | <b>No Statin Use<br/>(N=103)</b> | <b>P-value</b> |
|------------------------------------------|------------------------------|----------------------------------|----------------|
| <b>Initial Total Cholesterol (mg/dL)</b> | 106.1 (31.2)                 | 99.8 (35.1)                      | 0.238          |
| <b>Initial LDL (mg/dL)</b>               | 49.8 (25.9)                  | 50.1 (27.0)                      | 0.954          |
| <b>Initial HDL (mg/dL)</b>               | 30.4 (19.1)                  | 24.9 (18.0)                      | 0.059          |
| <b>Initial Triglycerides (mg/dL)</b>     | 129.1 (78.3)                 | 123.1 (58.2)                     | 0.587          |
| <b>48-hour Total Cholesterol (mg/dL)</b> | 100.5 (28.3)                 | 106.4 (34.8)                     | 0.264          |
| <b>48-hour LDL (mg/dL)</b>               | 49.4 (20.4)                  | 54.2 (26.4)                      | 0.228          |
| <b>48-hour HDL (mg/dL)</b>               | 21.2 (16.4)                  | 17.8 (15.4)                      | 0.194          |
| <b>48-hour Triglycerides (mg/dL)</b>     | 154.4 (88.9)                 | 164.8 (92.4)                     | 0.485          |

Data are mean and (standard deviations); Student's t-test for all tests of association

**Supplemental Table 2: Quantitative and Qualitative Cholesterol Differences by Infection Type**

|                                          | <b>Overall<sup>Ψ</sup></b><br>N=160 | <b>Gram Negative</b><br>N=67 | <b>Gram Positive</b><br>N=46 | <b>Culture Negative</b><br>N=47 | <b>P-value</b>            |
|------------------------------------------|-------------------------------------|------------------------------|------------------------------|---------------------------------|---------------------------|
| <b>Initial Total Cholesterol (mg/dL)</b> | 101.50 (33.24)                      | 92.14 (29.23)                | 99.56 (30.56)                | 116.85 (36.19)                  | <b>0.0004<sup>a</sup></b> |
| <b>Initial LDL (mg/dL)</b>               | 49.21 (26.13)                       | 41.05 (21.93)                | 46.91 (23.41)                | 62.59 (28.96)                   | <b>0.0001<sup>a</sup></b> |
| <b>Initial HDL (mg/dL)</b>               | 26.98 (18.47)                       | 24.22 (18.53)                | 24.96 (19.05)                | 32.89 (16.75)                   | <b>0.0313<sup>a</sup></b> |
| <b>Initial Triglycerides (mg/dL)</b>     | 125.69 (67.92)                      | 132.49 (62.38)               | 134.29 (88.71)               | 107.67 (46.79)                  | 0.0993 <sup>a</sup>       |
| <b>48-hour Total Cholesterol (mg/dL)</b> | 103.19 (31.63)                      | 97.66 (28.18)                | 99.52 (29.69)                | 114.48 (35.57)                  | <b>0.0167<sup>a</sup></b> |
| <b>48-hour LDL (mg/dL)</b>               | 51.68 (23.60)                       | 49.36 (23.02)                | 47.21 (22.45)                | 59.16 (24.22)                   | <b>0.0399<sup>a</sup></b> |
| <b>48-hour HDL (mg/dL)</b>               | 18.92 (15.65)                       | 15.53 (14.45)                | 17.24 (14.77)                | 25.30 (16.51)                   | <b>0.0042<sup>a</sup></b> |
| <b>48-hour Triglycerides (mg/dL)</b>     | 160.55 (91.20)                      | 172.58 (98.19)               | 157.90 (89.63)               | 146.11 (81.65)                  | 0.3323 <sup>a</sup>       |
| <b>T0 HII*</b>                           | 2.22 (1.45; 3.45)                   | 2.25 (1.25;3.04)             | 2.56 (1.90;4.07)             | 1.82 (1.35;3.13)                | 0.1020 <sup>b</sup>       |
| <b>T48 HII*</b>                          | 2.03 (1.41; 2.94)                   | 2.03 (1.33; 3.14)            | 2.21 (1.49; 3.19)            | 1.68 (1.21; 2.42)               | 0.2291 <sup>b</sup>       |

HII, HDL Inflammatory Index; Ψ: 11 patients with mixed growth cultures excluded; Data are mean and (standard deviations), unless otherwise specified: \* median and [IQR]; a) ANOVA, b) Kruskal-Wallis

**Supplemental Table 3: Pairwise Comparisons of Quantitative Cholesterol Differences**

| <b><i>Gram Negative vs. Gram Positive*</i></b>      |                  |                  |                   |
|-----------------------------------------------------|------------------|------------------|-------------------|
|                                                     | Gram Negative    | Gram Positive    | P value (t-test)  |
| <b>T0 Total Cholesterol</b>                         | 92.14 (29.23)    | 99.56 (30.56)    | 0.2001            |
| <b>T0 LDL</b>                                       | 41.05 (21.93)    | 46.91 (23.41)    | 0.1886            |
| <b>T0 HDL</b>                                       | 24.22 (18.53)    | 24.96 (19.05)    | 0.8386            |
| <b>T0 Triglycerides</b>                             | 132.49 (62.38)   | 134.29 (88.71)   | 0.9009            |
| <b>T48 Total Cholesterol</b>                        | 97.66 (28.18)    | 99.52 (29.69)    | 0.7469            |
| <b>T48 LDL</b>                                      | 49.36 (23.02)    | 47.21 (22.45)    | 0.6428            |
| <b>T48 HDL</b>                                      | 15.53 (14.45)    | 15.53 (14.45)    | 0.5595            |
| <b>T48 Triglycerides</b>                            | 172.58 (98.19)   | 157.90 (89.63)   | 0.4405            |
| <b><i>Gram Negative vs. Culture Negative*</i></b>   |                  |                  |                   |
|                                                     | Gram Negative    | Culture Negative | P value (t-test)  |
| <b>T0 Total Cholesterol</b>                         | 92.14 (29.23)    | 116.74 (35.80)   | <b>0.0001</b>     |
| <b>T0 LDL</b>                                       | 41.05 (21.93)    | 62.02 (28.90)    | <b>&lt;0.0001</b> |
| <b>T0 HDL</b>                                       | 24.22 (18.53)    | 32.83 (16.57)    | <b>0.0116</b>     |
| <b>T0 Triglycerides</b>                             | 132.49 (62.38)   | 110.32 (49.70)   | <b>0.0462</b>     |
| <b>T48 Total Cholesterol</b>                        | 97.66 (28.18)    | 114.49 (35.16)   | <b>0.0071</b>     |
| <b>T48 LDL</b>                                      | 49.36 (23.02)    | 58.43 (24.42)    | 0.0578            |
| <b>T48 HDL</b>                                      | 15.53 (14.45)    | 25.27 (16.32)    | <b>0.0015</b>     |
| <b>T48 Triglycerides</b>                            | 172.58 (98.19)   | 150 (84.83)      | 0.2169            |
| <b><i>Gram Positive vs. Culture Negative*</i></b>   |                  |                  |                   |
|                                                     | Gram Positive    | Culture Negative | P value (t-test)  |
| <b>T0 Total Cholesterol</b>                         | 99.56 (30.56)    | 116.85 (36.19)   | <b>0.0158</b>     |
| <b>T0 LDL</b>                                       | 46.91 (23.41)    | 62.59 (28.96)    | <b>0.0060</b>     |
| <b>T0 HDL</b>                                       | 24.96 (19.05)    | 32.89 (16.75)    | <b>0.0354</b>     |
| <b>T0 Triglycerides</b>                             | 134.29 (88.71)   | 107.67 (46.79)   | 0.0759            |
| <b>T48 Total Cholesterol</b>                        | 99.52 (29.69)    | 114.48 (35.57)   | <b>0.0377</b>     |
| <b>T48 LDL</b>                                      | 47.21 (22.45)    | 59.16 (24.22)    | <b>0.0208</b>     |
| <b>T48 HDL</b>                                      | 17.24 (14.77)    | 25.30 (16.51)    | <b>0.0195</b>     |
| <b>T48 Triglycerides</b>                            | 157.90 (89.63)   | 146.11 (81.65)   | 0.5251            |
| <b><i>Culture Positive vs. Culture Negative</i></b> |                  |                  |                   |
|                                                     | Culture Positive | Culture Negative | P value (t-test)  |
| <b>T0 Total Cholesterol</b>                         | 96.67 (30.87)    | 116.85 (36.19)   | <b>0.0004</b>     |
| <b>T0 LDL</b>                                       | 44.95 (23.68)    | 62.59 (28.96)    | <b>0.0001</b>     |
| <b>T0 HDL</b>                                       | 24.85 (18.76)    | 32.89 (16.75)    | <b>0.0109</b>     |
| <b>T0 Triglycerides</b>                             | 132.21 (71.70)   | 107.67 (46.79)   | <b>0.0329</b>     |
| <b>T48 Total Cholesterol</b>                        | 100.03 (30.35)   | 114.48 (35.57)   | <b>0.0116</b>     |
| <b>T48 LDL</b>                                      | 49.67 (23.90)    | 59.16 (24.22)    | <b>0.0294</b>     |
| <b>T48 HDL</b>                                      | 16.76 (14.94)    | 25.30 (16.51)    | <b>0.0021</b>     |
| <b>T48 Triglycerides</b>                            | 166.30 (93.96)   | 146.11 (81.65)   | 0.2119            |

Data are mean and (standard deviations). \*Data from 11 patients with mixed growth cultures excluded from analyses.

**Supplemental Table 4: Quantitative Differences in Cholesterol Levels Controlling for Organ Failure Severity**

|                                                                                       | Odds Ratio | P-Value          | 95% CI    |
|---------------------------------------------------------------------------------------|------------|------------------|-----------|
| <b>4A: Enrollment Differences Accounting for Initial Organ Failure Severity*</b>      |            |                  |           |
| <b>Outcome Variable: <i>Culture Positive Sepsis vs. Culture Negative Sepsis</i></b>   |            |                  |           |
| T0 Total Cholesterol                                                                  | 0.98       | <b>0.006</b>     | 0.97-1.00 |
| T0 LDL                                                                                | 0.98       | <b>0.004</b>     | 0.96-0.99 |
| T0 HDL                                                                                | 0.98       | <b>0.023</b>     | 0.96-1.00 |
| T0 Triglycerides                                                                      | 1.01       | 0.068            | 1.00-1.01 |
| <b>Outcome Variable: <i>Bacteremia vs. No Bacteremia</i></b>                          |            |                  |           |
| T0 Total Cholesterol                                                                  | 0.99       | <b>0.021</b>     | 0.98-1.00 |
| T0 LDL                                                                                | 0.99       | <b>0.026</b>     | 0.97-1.00 |
| T0 HDL                                                                                | 0.97       | <b>0.002</b>     | 0.95-0.99 |
| T0 Triglycerides                                                                      | 1.01       | <b>0.012</b>     | 1.00-1.01 |
| <b>Outcome Variable: <i>Gram Negative Bacteremia vs. Gram Positive Bacteremia</i></b> |            |                  |           |
| T0 Total Cholesterol                                                                  | 0.98       | <b>0.042</b>     | 0.96-1.00 |
| T0 LDL                                                                                | 0.97       | <b>0.016</b>     | 0.94-0.99 |
| T0 HDL                                                                                | 1.01       | 0.681            | 0.98-1.04 |
| T0 Triglycerides                                                                      | 1.00       | 0.531            | 0.99-1.00 |
| <b>4B: 48 Hour Differences Accounting for 48 Hour Organ Failure Severity*</b>         |            |                  |           |
| <b>Outcome Variable: <i>Culture Positive Sepsis vs. Culture Negative Sepsis</i></b>   |            |                  |           |
| T48 Total Cholesterol                                                                 | 0.99       | 0.076            | 0.98-1.00 |
| T48 LDL                                                                               | 0.99       | 0.202            | 0.97-1.01 |
| T48 HDL                                                                               | 0.97       | <b>0.020</b>     | 0.95-1.00 |
| T48 Triglycerides                                                                     | 1.00       | 0.224            | 1.00-1.01 |
| <b>Outcome Variable: <i>Bacteremia vs. No Bacteremia</i></b>                          |            |                  |           |
| T48 Total Cholesterol                                                                 | 0.99       | 0.157            | 0.98-1.00 |
| T48 LDL                                                                               | 0.99       | 0.084            | 0.97-1.00 |
| T48 HDL                                                                               | 0.95       | <b>&lt;0.001</b> | 0.92-0.98 |
| T48 Triglycerides                                                                     | 1.00       | <b>0.024</b>     | 1.00-1.01 |
| <b>Outcome Variable: <i>Gram Negative Bacteremia vs. Gram Positive Bacteremia</i></b> |            |                  |           |
| T48 Total Cholesterol                                                                 | 1.00       | 0.994            | 0.98-1.02 |
| T48 LDL                                                                               | 1.01       | 0.688            | 0.98-1.03 |
| T48 HDL                                                                               | 0.98       | 0.421            | 0.94-1.03 |
| T48 Triglycerides                                                                     | 1.00       | 0.312            | 1.00-1.01 |

\*Logistic regression was used to control for organ severity, quantified as SOFA score at enrollment for T0 comparisons or 48 hours for T48 comparisons.

**Supplementary Table 5: Qualitative Cholesterol Differences (Dysfunctional HDL) in the Bacteremia Subgroup**

| <b><i>Bacteremia vs No Bacteremia</i></b>                                       |                                   |                                      |                                      |                     |
|---------------------------------------------------------------------------------|-----------------------------------|--------------------------------------|--------------------------------------|---------------------|
|                                                                                 | <i>Overall (N=171)</i>            | <i>Blood Culture Positive (N=78)</i> | <i>Blood Culture Negative (N=93)</i> | <i>P-Value</i>      |
| <b>T0 HII</b>                                                                   | 2.22 [1.48, 3.48]                 | 2.25 [1.46, 3.54]                    | 2.14 [1.49, 3.29]                    | 0.6636 <sup>a</sup> |
| <b>T48 HII</b>                                                                  | 2.03 [1.34, 2.98]                 | 2.22 [1.43, 3.19]                    | 1.84 [1.22, 2.60]                    | 0.1916 <sup>a</sup> |
| <b><i>Gram Negative Bacteremia vs Gram Positive Bacteremia</i></b> <sup>‡</sup> |                                   |                                      |                                      |                     |
|                                                                                 | <i>Overall (N=75)<sup>‡</sup></i> | <i>Gram Negative (N=46)</i>          | <i>Gram Positive (N=29)</i>          | <i>P-Value</i>      |
| <b>T0 HII</b>                                                                   | 2.31 [1.47, 3.57]                 | 2.26 [1.25, 2.81]                    | 2.52 [1.74, 4.39]                    | 0.2141 <sup>a</sup> |
| <b>T48 HII</b>                                                                  | 2.30 [1.46, 3.27]                 | 2.30 [1.43, 3.56]                    | 2.31 [1.49, 3.02]                    | 0.9597 <sup>a</sup> |

HII, HDL Inflammatory Index; Data are median and (interquartile ranges); a) Wilcoxon ranksum, b) Kruskal-Wallis; ‡: 3 patients with mixed growth blood cultures excluded
